# Supplementary material for: A mixed methods systematic review of multimodal non-pharmacological interventions to improve cognition for people with dementia
Source: PubMed Central journal article supplement — Dementia (London). 2018 Sep 7;19(4):1086–130. doi: 10.1177/1471301218795289 (PMC7180318; doi:10.1177/1471301218795289), 2018-09-07
Supplement: Supplementary_material3.pdf [file Supplementary_material3.pdf]

### Appendix 3 – Quality Appraisal with Mixed Methods Appraisal Tool (MMAT)

| SUMMARY      |            |                                                       |                                                                                                                                                                                                                                                                        |
|--------------|------------|-------------------------------------------------------|------------------------------------------------------------------------------------------------------------------------------------------------------------------------------------------------------------------------------------------------------------------------|
| SCORE        | PERCENT    | Study design                                          |                                                                                                                                                                                                                                                                        |
|              |            | <b>1. Qualitative</b>                                 |                                                                                                                                                                                                                                                                        |
|              |            | <b>0</b>                                              |                                                                                                                                                                                                                                                                        |
| <b>Score</b> | <b>%</b>   | <b>2. Quantitative randomized controlled (trials)</b> |                                                                                                                                                                                                                                                                        |
| 4            | 100%       | 1                                                     | Baglio, F., et al. (2015). "Multistimulation group therapy in alzheimer's disease promotes changes in brain functioning." <i>Neurorehabilitation and Neural Repair</i> 29(1): 13-24.                                                                                   |
| 2            | 50%        | 1                                                     | Burgener, S. C., et al. (2008). "The effects of a multimodal intervention on outcomes of persons with early-stage dementia." <i>American Journal of Alzheimer's Disease and Other Dementias</i> 23(4): 382-394.                                                        |
| 3            | 75%        | 1                                                     | Christofoletti, G., et al. (2008). "A controlled clinical trial on the effects of motor intervention on balance and cognition in institutionalized elderly patients with dementia." <i>Clin Rehabil</i> 22(7): 618-626.                                                |
| 3            | 75%        | 1                                                     | Graessel, E., et al. (2011). "Non-pharmacological, multicomponent group therapy in patients with degenerative dementia: a 12-month randomized, controlled trial." <i>BMC Med</i> 9: 129-129.                                                                           |
| 4            | 100%       | 1                                                     | Han, J. W., et al. (2017). "Multimodal Cognitive Enhancement Therapy for Patients with Mild Cognitive Impairment and Mild Dementia: A Multi-Center, Randomized, Controlled, Double-Blind, Crossover Trial." <i>Journal Of Alzheimer's Disease: JAD</i> 55(2): 787-796. |
| 1            | 25%        | 1                                                     | Jian, G. (1999). "Treatment of 50 cases of senile dementia by acupuncture combined with inhalation of herbal drugs and oxygen." <i>J Tradit Chin Med</i> 19(4): 287-289.                                                                                               |
| 4            | 100%       | 1                                                     | Kim, M-J., et al. (2016). "Physical Exercise with Multicomponent Cognitive Intervention for Older Adults with Alzheimer's Disease: A 6-Month Randomized Controlled Trial." <i>Dement Geriatr Cogn Dis Extra</i> 6(2): 222-232.                                         |
| 4            | 100%       | 1                                                     | Maci, T., et al. (2012). "Physical and cognitive stimulation in Alzheimer Disease. the GAIA Project: a pilot study." <i>American Journal of Alzheimer's Disease and Other Dementias</i> 27(2): 107-113.                                                                |
| 3            | 75%        | 1                                                     | Onor, M. L., et al. (2007). "Impact of a multimodal rehabilitative intervention on demented patients and their caregivers." <i>American Journal of Alzheimer's Disease and Other Dementias</i> 22(4): 261-272.                                                         |
| 4            | 100%       | 1                                                     | Oswald, W. D., et al. (2007). "Effects of a multimodal activation program (SimA-P) in residents of nursing homes." <i>European Review of Aging and Physical Activity</i> 4(2): 91-102.                                                                                 |
| 3            | 75%        | 1                                                     | Vicente de Sousa, O., et al. (2017). "Impact of Nutritional Supplementation and a Psychomotor Program on Patients With Alzheimer's Disease." <i>Am J Alzheimers Dis Other Demen</i> 32(6): 329-341.                                                                    |
| 3            | 75%        | 1                                                     | Yoon, J. E., et al. (2013). "The effects of cognitive activity combined with active extremity exercise on balance, walking activity, memory level and quality of life of an older adult sample with dementia." <i>J Phys Ther Sci</i> 25(12): 1601-1604.               |
|              |            |                                                       |                                                                                                                                                                                                                                                                        |
| <b>38</b>    | <b>79%</b> | <b>12</b>                                             | [Quality percentage without Jian (1999) = 84%]                                                                                                                                                                                                                         |
|              |            |                                                       |                                                                                                                                                                                                                                                                        |
| <b>Score</b> | <b>%</b>   | <b>3. Quantitative non-randomized</b>                 |                                                                                                                                                                                                                                                                        |
| 4            | 100%       | 1                                                     | Arkin, S. M. (2007). "Language-Enriched Exercise Plus Socialization Slows Cognitive Decline in Alzheimer's Disease." <i>American Journal of Alzheimer's Disease &amp; Other Dementias</i> 22(1): 62-77.                                                                |
| 4            | 100%       | 1                                                     | Coelho, F. G. d. M., et al. (2013). "Multimodal exercise intervention improves frontal cognitive functions and gait in Alzheimer's disease: a controlled trial." <i>Geriatrics &amp; Gerontology International</i> 13(1): 198-203.                                     |
| 4            | 100%       | 1                                                     | Kang, H. Y., et al. (2010). "An integrated dementia intervention for Korean older adults." <i>J Psychosoc Nurs Ment Health Serv</i> 48(12): 42-50.                                                                                                                     |

|              |                 |                                    |                                                                                                                                                                                                                              |
|--------------|-----------------|------------------------------------|------------------------------------------------------------------------------------------------------------------------------------------------------------------------------------------------------------------------------|
| 4            | 100%            | 1                                  | Li, D. M. and X. X. Li (2017). "The effect of folk recreation program in improving symptoms: a study of Chinese elder dementia patients." <i>Int J Geriatr Psychiatry</i> 32(8): 901-908.                                    |
| 4            | 100%            | 1                                  | Viola, L. F., et al. (2011). "Effects of a multidisciplinary cognitive rehabilitation program for patients with mild Alzheimer's disease." <i>Clinics (Sao Paulo)</i> 66(8): 1395-1400.                                      |
|              |                 |                                    |                                                                                                                                                                                                                              |
| <b>20</b>    | <b>100%</b>     | <b>5</b>                           |                                                                                                                                                                                                                              |
|              |                 |                                    |                                                                                                                                                                                                                              |
| <b>Score</b> | <b>%</b>        | <b>4. Quantitative descriptive</b> |                                                                                                                                                                                                                              |
| 4            | 100%            | 1                                  | Bredesen, D. E., et al. (2016). "Reversal of cognitive decline in Alzheimer's disease." <i>Aging (Albany NY)</i> 8(6): 1250-1258. (4 Patients)                                                                               |
| 4            | 100%            | 1                                  | Ibarria, M., et al. (2016). "Beneficial Effects of an Integrated Psychostimulation Program in Patients with Alzheimer's Disease." <i>J Alzheimers Dis</i> 50(2): 559-566.                                                    |
| 4            | 100%            | 1                                  | La Rue, A., et al. (2015). "Intervention of multi-modal activities for older adults with dementia translation to rural communities." <i>Am J Alzheimers Dis Other Demen</i> 30(5): 468-477.                                  |
| 4            | 100%            | 1                                  | Prokopov, A. F. (2010). "A case of recovery from dementia following rejuvenative treatment." <i>Rejuvenation Res</i> 13(2-3): 217-219.                                                                                       |
| 4            | 100%            | 1                                  | Raggi, A., et al. (2007). "The effects of a comprehensive rehabilitation program of Alzheimer's Disease in a hospital setting." <i>Behavioural Neurology</i> 18(1): 1-6.                                                     |
| 4            | 100%            | 1                                  | Serda i Ferrer, B. C. and A. del Valle (2014). "A rehabilitation program for Alzheimer's disease." <i>J Nurs Res</i> 22(3): 192-199.                                                                                         |
| 4            | 100%            | 1                                  | Tay, L., et al. (2016). "A combined cognitive stimulation and physical exercise programme (MINDVital) in early dementia: Differential effects on single- and dual-task gait performance." <i>Gerontology</i> 62(6): 604-610. |
|              |                 |                                    |                                                                                                                                                                                                                              |
| <b>28</b>    | <b>100%</b>     | <b>7</b>                           |                                                                                                                                                                                                                              |
|              |                 |                                    |                                                                                                                                                                                                                              |
|              |                 | <b>5. Mixed methods</b>            |                                                                                                                                                                                                                              |
|              |                 | 0                                  |                                                                                                                                                                                                                              |
|              | <b>TOTAL</b>    | <b>24</b>                          |                                                                                                                                                                                                                              |
|              | <b>INCLUDED</b> | <b>23</b>                          | Excluding Jian (1999); includes a total of 23 papers (26 studies = 21 group studies and 5 case studies)                                                                                                                      |

Pace, R., Pluye, P., Bartlett, G., Macaulay, A. C., Salsberg, J., Jagosh, J. and Seller, R. (2012) 'Testing the reliability and efficiency of the pilot Mixed Methods Appraisal Tool (MMAT) for systematic mixed studies review', *International Journal of Nursing Studies*, 49(1), pp. 47-53.

Souto, R. Q., Khanassov, V., Hong, Q. N., Bush, P. L., Vedel, I. and Pluye, P. (2015) 'Systematic mixed studies reviews: Updating results on the reliability and efficiency of the mixed methods appraisal tool', *International Journal of Nursing Studies*, 52(1), pp. 500-501.

<http://www.nccmt.ca/knowledge-repositories/search/232>

<http://mixedmethodsappraisaltoolpublic.pbworks.com/w/file/fetch/84371689/MMAT%202011%20criteria%20and%20tutorial%202011-06-29updated2014.08.21.pdf>

<http://mixedmethodsappraisaltoolpublic.pbworks.com/w/file/fetch/82542649/Souto%20et%20al.%20MMAT%20testing.%20MMIRA%202014%20conference.pdf>
