# Supplementary material for: A mixed methods systematic review of multimodal non-pharmacological interventions to improve cognition for people with dementia
Source: PubMed Central journal article supplement — Dementia (London). 2018 Sep 7;19(4):1086–130. doi: 10.1177/1471301218795289 (PMC7180318; doi:10.1177/1471301218795289), 2018-09-07
Supplement: Supplementary_material4.pdf [file Supplementary_material4.pdf]

#### Appendix 4. Acronyms and abbreviations

7MS - 7 Minute Screening

ABCD - Arizona Battery for Communication Disorders of Dementia

AD – Alzheimer’s disease

ADAS-Cog - Alzheimer's Disease Assessment Scale cognitive subscale

ADAS-K - Korean version of Alzheimer's Disease Assessment Scale

BCSB - Brief Cognitive Screening Battery

BDNF - brain derived neurotrophic factor

BPSD - behavioural and psychological symptoms of dementia

CBF – cerebral blood flow

CDR - Clinical Dementia Rating

CERAD - Consortium to Establish a Registry for Alzheimer’s Disease

CI – cognitive intervention

CS - cognitive stimulation

CT – cognitive training

CR – cognitive rehabilitation

CVLT – California Verbal Learning Test

DSB - Digit Span Backward

DSF - Digit Span Forward

DNA - Deoxyribonucleic acid

ES - effect size

FAB - Frontal Assessment Battery

FDG - fluorodeoxyglucose PET scan

GDS - Global Deterioration Scale

IPP - Integral Psychostimulation Program

KEP – Kohzuki Exercise Program

MCET - multimodal cognitive enhancement therapy

MCI - mild cognitive impairment

MCID - minimal clinically important difference (according to Burbach et al. 1999; Huntley et al 2015)

MCP - multi-component cognitive program

MFI - mental function index

MID - Minimal Important Difference (according to NICE, 2018)

MMAT - Mixed Methods Appraisal Tool

MMSE – Mini Mental State Examination

MNPIs - multimodal non-pharmacological interventions

MoCA – Montreal Cognitive Assessment

MODA - Milan Overall Dementia Assessment

MRI – magnetic resonance imaging

NAI - Neuropsychological Aging Inventory

NICE – National Institute for Health and Care Excellence

NMDA - (N-methyl-D-aspartate) receptor antagonist

NSPRG - nutritional supplementation psychomotor rehabilitation program

PET scan - amyloid positron emission tomography (PET) scan

QoL - quality of life

RCT – randomised controlled trial

SCI - subjective cognitive impairment

SKT - Short Cognitive Test

WAIS-R - Wechsler Memory Scale – Revised
